# Supplementary material
Source: publisher figshare collection journal article supplement (https://frontiersin.figshare.com/ndownloader/files/28852197)
Supplement: Supplementary file [file 28852197]

## Supplementary Material

### Supplementary Data:

*Rodríguez-Hernández et al. The second oncogenic hit determines the cell fate of ETV6-RUNX1 positive leukemia*

### Supplementary Tables:

**Supplementary Table 1:**

| GENOTYPE                                                     | TOTAL | ALL            | T-ALL          | B-ALL         | FACILITY |
|--------------------------------------------------------------|-------|----------------|----------------|---------------|----------|
| ETV6- <sup>ETV6-RUNX1</sup><br>+Mb1-Cre                      | 31    | 0              | 0              | 0             | CF       |
| ETV6- <sup>ETV6-RUNX1</sup><br>+Sca1-Cre                     | 32    | 13<br>(40.63%) | 11<br>(34.38%) | 2<br>(6.25%)  | CF       |
| Sca1-ETV6-<br>RUNX1 +<br>Kdm5c <sup>f/wt</sup> +Mb1-<br>Cre  | 22    | 0              | 0              | 0             | SPF      |
| Sca1-ETV6-<br>RUNX1 +<br>Kdm5c <sup>f/wt</sup> +Sca1-<br>Cre | 9     | 2<br>(22.2%)   | 0              | 2<br>(22.2%)  | SPF      |
| Sca1-ETV6-<br>RUNX1 + Pax5-<br>het                           | 8     | 5<br>(62.50%)  | 0              | 5<br>(62.50%) | SPF      |

CF: Conventional Facility; SPF: Specific Pathogen Free

**Supplementary Table 1: Incidence of disease mice in ETV6-<sup>ETV6-RUNX1</sup>+Sca1-Cre; ETV6-<sup>ETV6-RUNX1</sup>+Mb1-Cre mice, Kdm5c<sup>f/wt</sup> + Sca1-ETV6/RUNX1+ Mb1-Cre mice and Sca1-ETV6/RUNX1+ Kdm5c<sup>f/wt</sup> + Sca1-Cre mice.**

**Supplementary Table 2: List of all genes from comparisons in Figure 7C.**

Supplementary Table 2 is presented as an independent Excel file.

**Supplementary Table 3: List of resources used in the study.**

| REAGENT or RESOURCE                             |                                                                                                                                                                                                                                                     | SOURCE                                                                                                                    |
|-------------------------------------------------|-----------------------------------------------------------------------------------------------------------------------------------------------------------------------------------------------------------------------------------------------------|---------------------------------------------------------------------------------------------------------------------------|
| <b>Antibodies</b>                               |                                                                                                                                                                                                                                                     |                                                                                                                           |
| CD4 (RM4-5)                                     | Flow cytometry                                                                                                                                                                                                                                      | Biolegend                                                                                                                 |
| CD8a (53-6.7)                                   | Flow cytometry                                                                                                                                                                                                                                      | Biolegend                                                                                                                 |
| CD3E (145-2C11)                                 | Flow cytometry                                                                                                                                                                                                                                      | Biolegend                                                                                                                 |
| B220 (RA3-6B2)                                  | Flow cytometry                                                                                                                                                                                                                                      | Biolegend                                                                                                                 |
| IgM (RMM-1)                                     | Flow cytometry                                                                                                                                                                                                                                      | Biolegend                                                                                                                 |
| CD19 (1D3)                                      | Flow cytometry                                                                                                                                                                                                                                      | Biolegend                                                                                                                 |
| CD11b/Mac1 (M1/70)                              | Flow cytometry                                                                                                                                                                                                                                      | Biolegend                                                                                                                 |
| Ly-6G/Gr1 (RB6-8C5)                             | Flow cytometry                                                                                                                                                                                                                                      | Biolegend                                                                                                                 |
| CD25 (PC61)                                     | Flow cytometry                                                                                                                                                                                                                                      | Biolegend                                                                                                                 |
| CD117/c-Kit (2B8)                               | Flow cytometry                                                                                                                                                                                                                                      | Biolegend                                                                                                                 |
| CD16/CD32 (2.4G2)                               | Flow cytometry                                                                                                                                                                                                                                      | BD Biosciences                                                                                                            |
| RUNX1                                           | Western Blot                                                                                                                                                                                                                                        | Abcam, ab23980                                                                                                            |
| β-Actin                                         | Western Blot                                                                                                                                                                                                                                        | C4: sc-47778                                                                                                              |
| <b>Experimental Models: Organisms/Strains</b>   |                                                                                                                                                                                                                                                     |                                                                                                                           |
| Mice: ETV6- <sup>ETV6-RUNX1</sup> (C57BL6J/CBA) | Schindler et al., 2009                                                                                                                                                                                                                              | Schindler et al., 2009                                                                                                    |
| Mice: Mb1-Cre (C57BL6J/CBA)                     | Hobeika et al., 2006                                                                                                                                                                                                                                | Hobeika et al., 2006                                                                                                      |
| Mice: Sca1-Cre (C57BL6J/CBA)                    | Mainardi et al., 2014                                                                                                                                                                                                                               | Mainardi et al., 2014                                                                                                     |
| Mice: Kdm5c <sup>fl/wt</sup> (C57BL/6N)         | Kdm5c <sup>tm1c</sup> (EUCOMM)Hmgu>/lcs                                                                                                                                                                                                             | EMMA public repository (Strain ID: EMMA:06928)                                                                            |
| Mice: Sca1-ETV6-RUNX1 (C57BL6J/CBA)             | Rodriguez-Hernandez et al., 2017a                                                                                                                                                                                                                   | Rodriguez-Hernandez et al., 2017a                                                                                         |
| Mice: Pax5-het (C57BL6J/CBA)                    | Urbanek P et al., 1994                                                                                                                                                                                                                              | Urbanek P et al., 1994                                                                                                    |
| <b>Experimental Models: Cell Lines</b>          |                                                                                                                                                                                                                                                     |                                                                                                                           |
| REH cells                                       | ATCC CRL-8286                                                                                                                                                                                                                                       | ETV6-RUNX1 translocation positive B lymphoblastic cell line                                                               |
| <b>Oligonucleotides</b>                         |                                                                                                                                                                                                                                                     |                                                                                                                           |
| V <sub>H</sub> 558                              | forward                                                                                                                                                                                                                                             | CGAGCTCTCCARCACAGCCTWCATGCARCTCARC                                                                                        |
|                                                 | reverse                                                                                                                                                                                                                                             | GTCTAGATTCTCACAAGAGTCCGATAGACCCTGG                                                                                        |
| V <sub>H</sub> 7183                             | forward                                                                                                                                                                                                                                             | CGGTACCAAGAASAMCCTGTWCCTGCAAATGASC                                                                                        |
|                                                 | reverse                                                                                                                                                                                                                                             | GTCTAGATTCTCACAAGAGTCCGATAGACCCTGG                                                                                        |
| V <sub>H</sub> Q52                              | forward                                                                                                                                                                                                                                             | CGGTACCAGACTGARCATCSCAAGGACAAYTCC                                                                                         |
|                                                 | reverse                                                                                                                                                                                                                                             | GTCTAGATTCTCACAAGAGTCCGATAGACCCTGG                                                                                        |
| DH                                              | forward                                                                                                                                                                                                                                             | TTCAAAGCACAAATGCCTGGCT                                                                                                    |
|                                                 | reverse                                                                                                                                                                                                                                             | GTCTAGATTCTCACAAGAGTCCGATAGACCCTGG                                                                                        |
| Cμ                                              | forward                                                                                                                                                                                                                                             | TGGCCATGGGCTGCCTAGCCCGGGACTT                                                                                              |
|                                                 | reverse                                                                                                                                                                                                                                             | GCCTGACTGAGCTCACACAAGGAGGA                                                                                                |
| <b>Software and Algorithms</b>                  |                                                                                                                                                                                                                                                     |                                                                                                                           |
| FlowJo (version 10.1.r7)                        | FlowJo, LLC                                                                                                                                                                                                                                         | <a href="https://www.flowjo.com/solutions/flowjo">https://www.flowjo.com/solutions/flowjo</a>                             |
| GraphPad Prism (version 6.0)                    | GraphPad Software Inc                                                                                                                                                                                                                               | <a href="https://www.graphpad.com/scientific-software/prism/">https://www.graphpad.com/scientific-software/prism/</a>     |
| Partek Flow                                     | Partek Incorporated, Missouri, USA                                                                                                                                                                                                                  | <a href="https://www.partek.com/">https://www.partek.com/</a>                                                             |
| Bowtie 2 v2.2.5 aligner                         | Johns Hopkins University                                                                                                                                                                                                                            | <a href="http://bowtie-bio.sourceforge.net/bowtie2/index.shtml">http://bowtie-bio.sourceforge.net/bowtie2/index.shtml</a> |
| <b>Data collection</b>                          |                                                                                                                                                                                                                                                     |                                                                                                                           |
| BD AccuriTM C6 Flow Cytometer                   | <a href="https://www.bdbiosciences.com/en-us/products/instruments/flow-cytometers/research-cell-analyzers/bd-accuri-c6-plus">https://www.bdbiosciences.com/en-us/products/instruments/flow-cytometers/research-cell-analyzers/bd-accuri-c6-plus</a> |                                                                                                                           |
| 2100 Bioanalyzer system                         | <a href="https://www.agilent.com/en/product/automated-electrophoresis/bioanalyzer-systems/bioanalyzer-instrument">https://www.agilent.com/en/product/automated-electrophoresis/bioanalyzer-systems/bioanalyzer-instrument</a>                       |                                                                                                                           |
| HiSeq 2500 (Illumina)                           | <a href="https://emea.illumina.com/systems/sequencing-platforms/hiseq-2500.html">https://emea.illumina.com/systems/sequencing-platforms/hiseq-2500.html</a>                                                                                         |                                                                                                                           |
| <b>Deposited Data</b>                           |                                                                                                                                                                                                                                                     |                                                                                                                           |
| RNA sequencing data                             | GEO Series accession number: GSE141112                                                                                                                                                                                                              | <a href="https://www.ncbi.nlm.nih.gov/geo/query/acc.cgi">https://www.ncbi.nlm.nih.gov/geo/query/acc.cgi</a>               |
| <b>Online available Data</b>                    |                                                                                                                                                                                                                                                     |                                                                                                                           |
| St. Jude Cloud PeCan                            | human B- or T-ALL                                                                                                                                                                                                                                   | <a href="https://pecan.stjude.cloud/">https://pecan.stjude.cloud/</a>                                                     |

## Supplementary Figures:

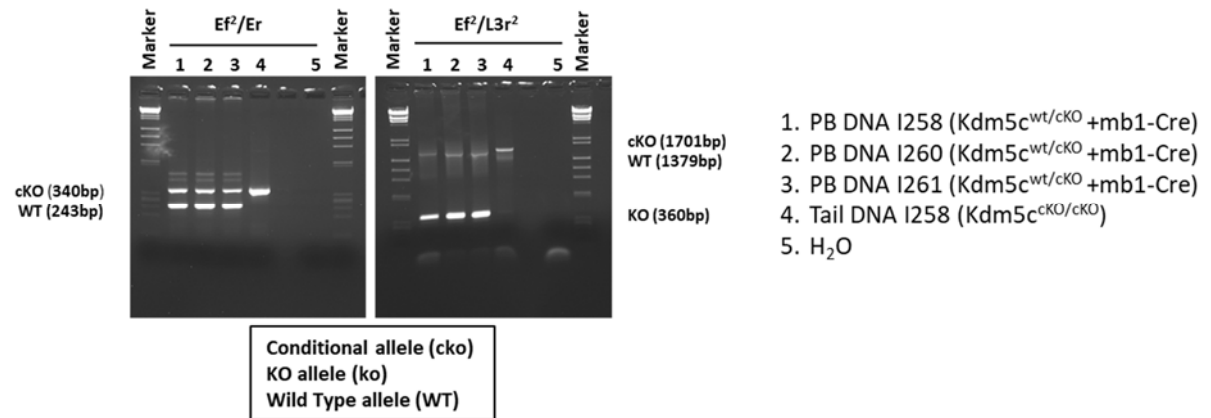

**Supplementary Figure 1. PCR to detect deletion of Kdm5c mediated by Mb1-cre in peripheral blood of kdm5c<sup>wt/cKO</sup> +Mb1-Cre mice.** PCR analysis confirms deletion of the kdm5c allele in peripheral blood of kdm5<sup>cko/wt</sup> mice when crossed with Mb1-Cre mice. As expected, there are still some cells in the peripheral blood that have not deleted the conditional kdm5c allele (cKO band).

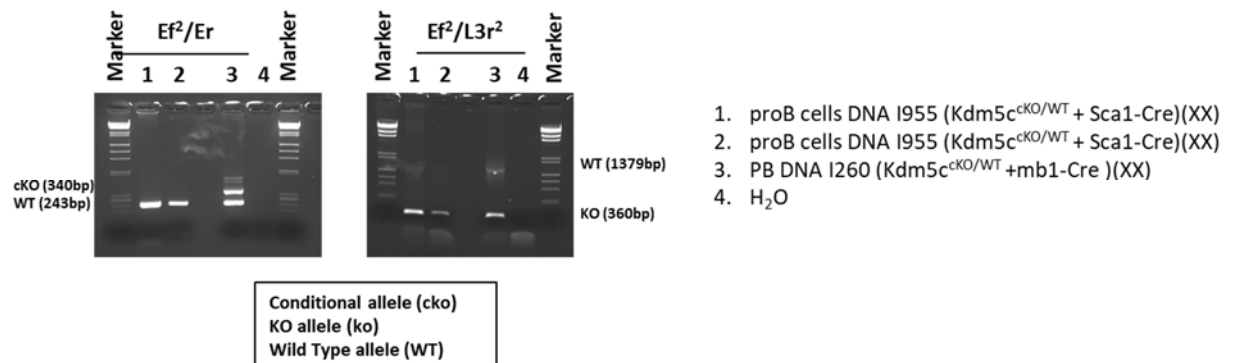

**Supplementary Figure 2. PCR to detect deletion of Kdm5c mediated by Sca1-Cre in pro-B cells of kdm5c<sup>wt/cKO</sup> +Sca1-Cre mice.** PCR analysis confirms deletion of the kdm5c allele in bone marrow proB cells of kdm5<sup>cko/wt</sup> mice when crossed with Sca1-Cre mice.

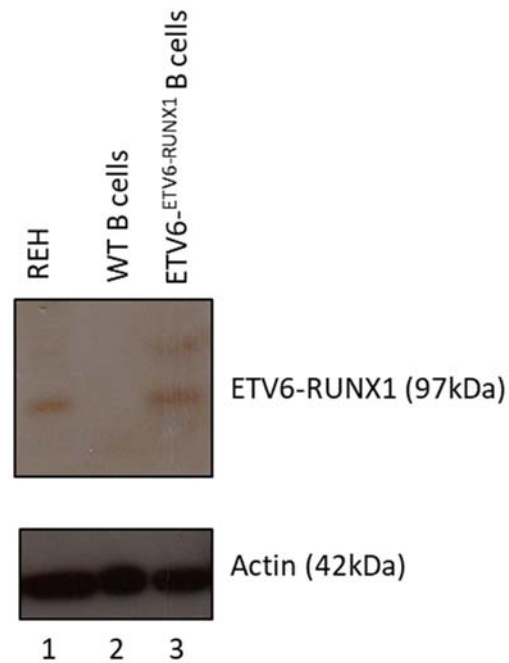

**Supplementary Figure 3.** Western blot of ETV6-RUNX1 protein from FACS sorted B cells derived from ETV6-<sup>ETV6-RUNX1</sup>+Mb1-Cre mice. Lane 1, positive control: human B-ALL cell line carrying ETV6-RUNX1 fusion (REH); lane 2, negative control: FACS sorted B cells derived from WT mice; lane 3, FACS sorted B cells derived from ETV6-<sup>ETV6-RUNX1</sup>+Mb1-Cre mice.

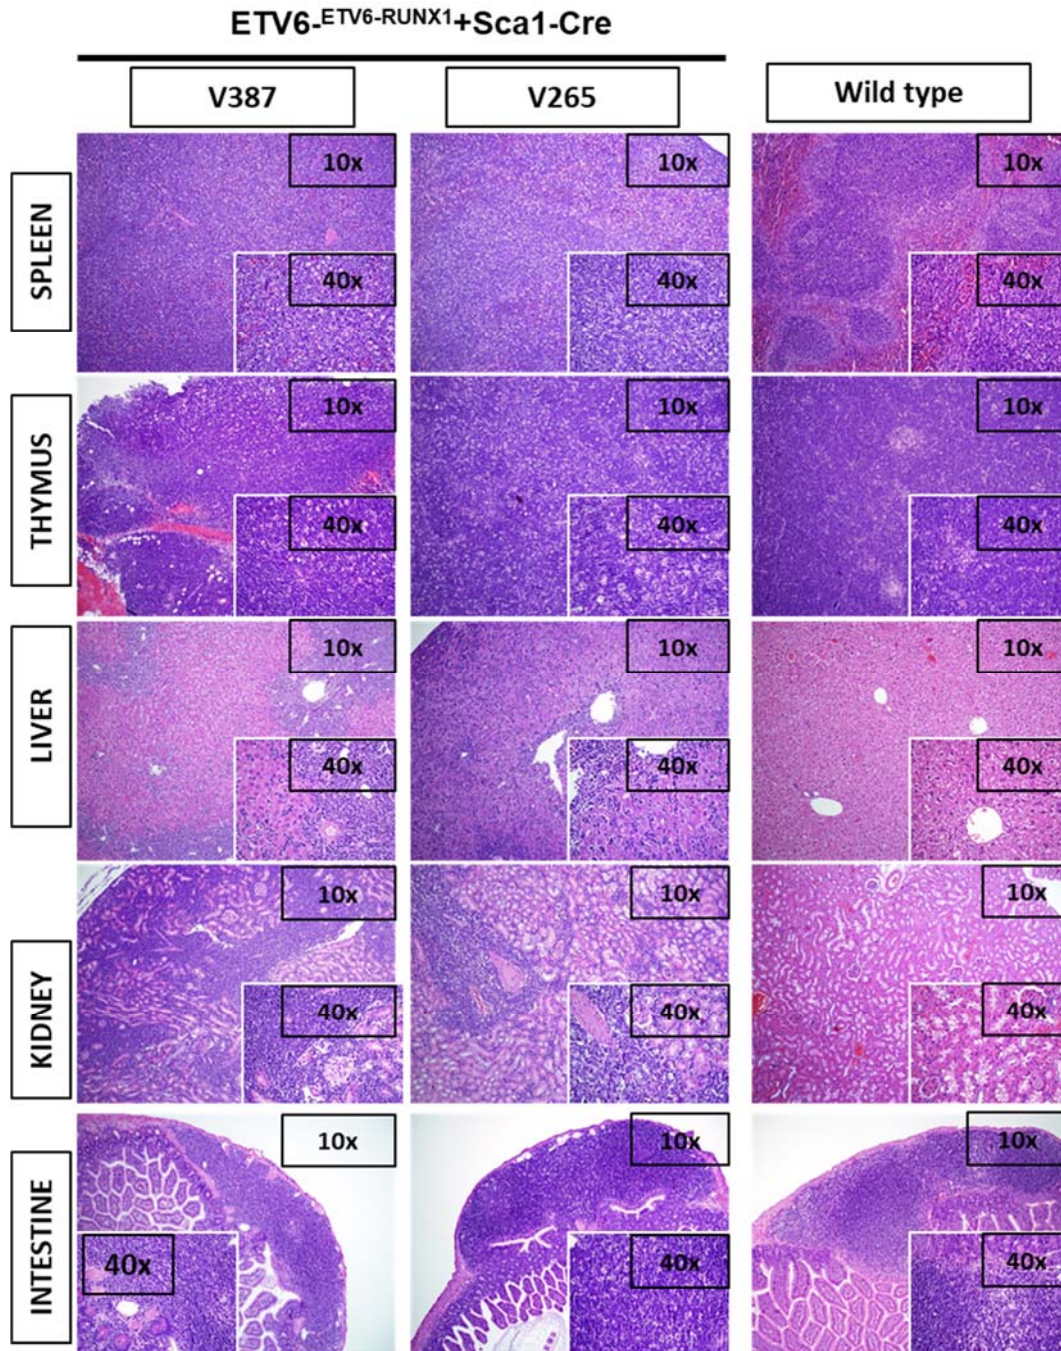

**Supplementary Figure 4. Histological images of ETV6-ETV6-RUNX1+Sca1-Cre disease mice with T-ALL.** Hematoxylin and eosin staining of spleen, thymus, liver, kidney and small intestine from wild-type and tumor-bearing ETV6-ETV6-RUNX1+Sca1-Cre mice shows loss of normal architecture resulting from effacement with cells morphologically resembling lymphoblasts.

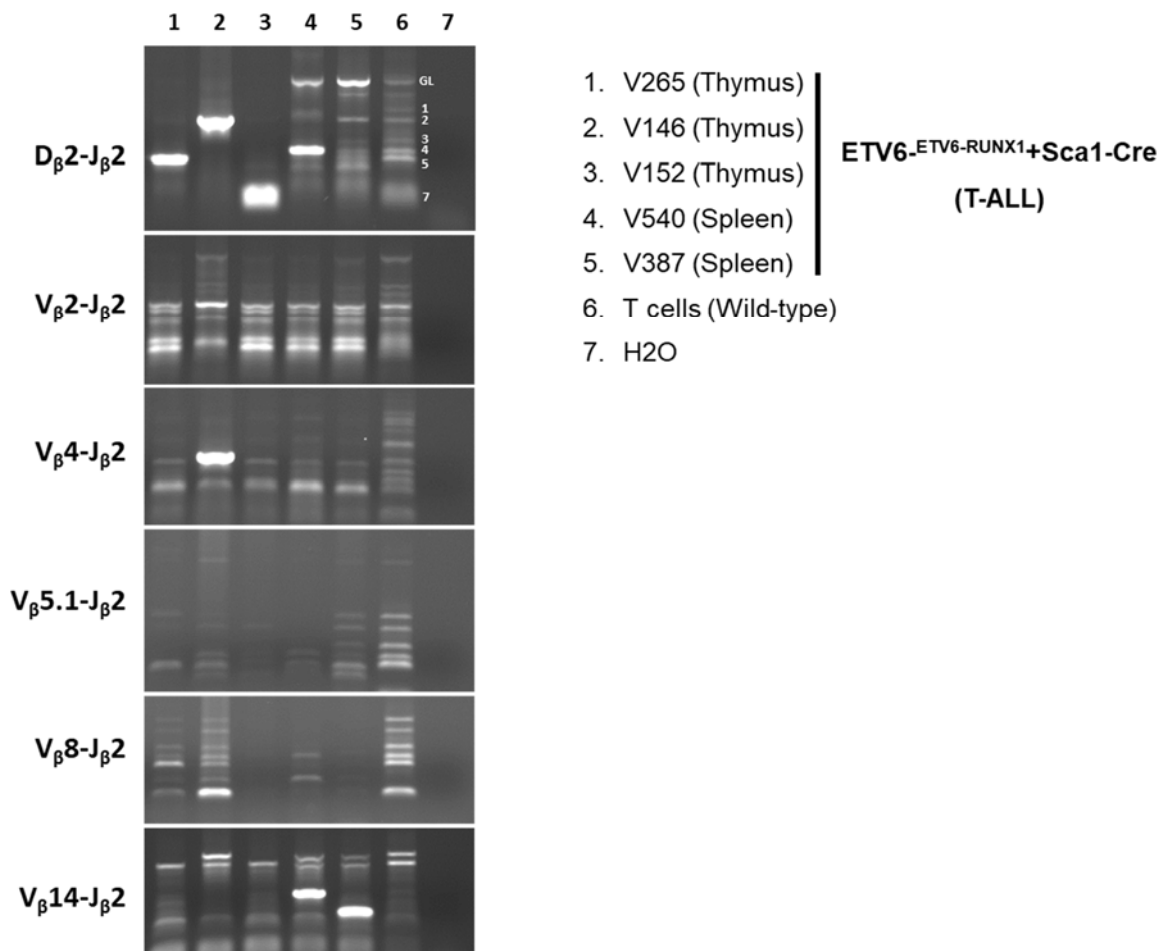

**Supplementary Figure 5. Mouse TCR Rearrangement analyzed by PCR of ETV6-ETV6-RUNX1+Sca1-Cre disease mice with T-ALL.** TCR clonality in ETV6-ETV6-RUNX1+Sca1-Cre mice. PCR analysis of *TCR* gene rearrangements in infiltrated thymuses of diseased ETV6-ETV6-RUNX1+Sca1-Cre leukemic mice. Sorted DP T cells from the thymus of healthy mice served as a control for polyclonal TCR rearrangements. Leukemic thymus shows an increased clonality within their TCR repertoire (indicated by the code number of each mouse analyzed).



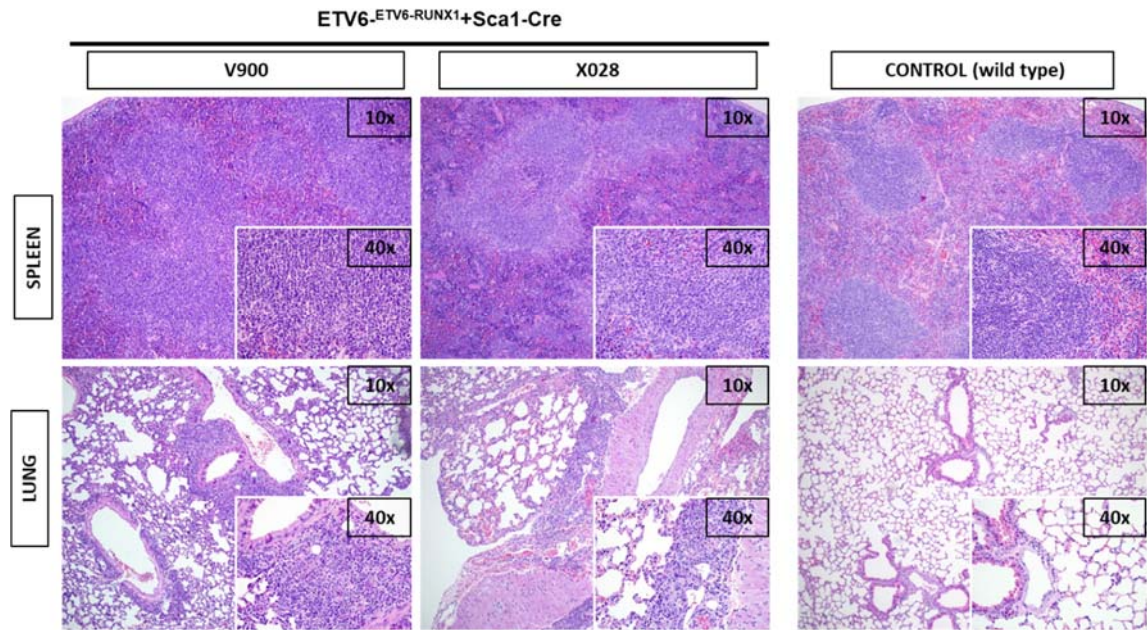

**Supplementary Figure 6. Histological images of ETV6-ETV6-RUNX1+Sca1-Cre disease mice with B-ALL.** Hematoxylin and eosin staining of spleen and lung from wild-type and tumor-bearing ETV6-ETV6-RUNX1+Sca1-Cre mice shows loss of normal architecture resulting from effacement with cells morphologically resembling lymphoblasts.

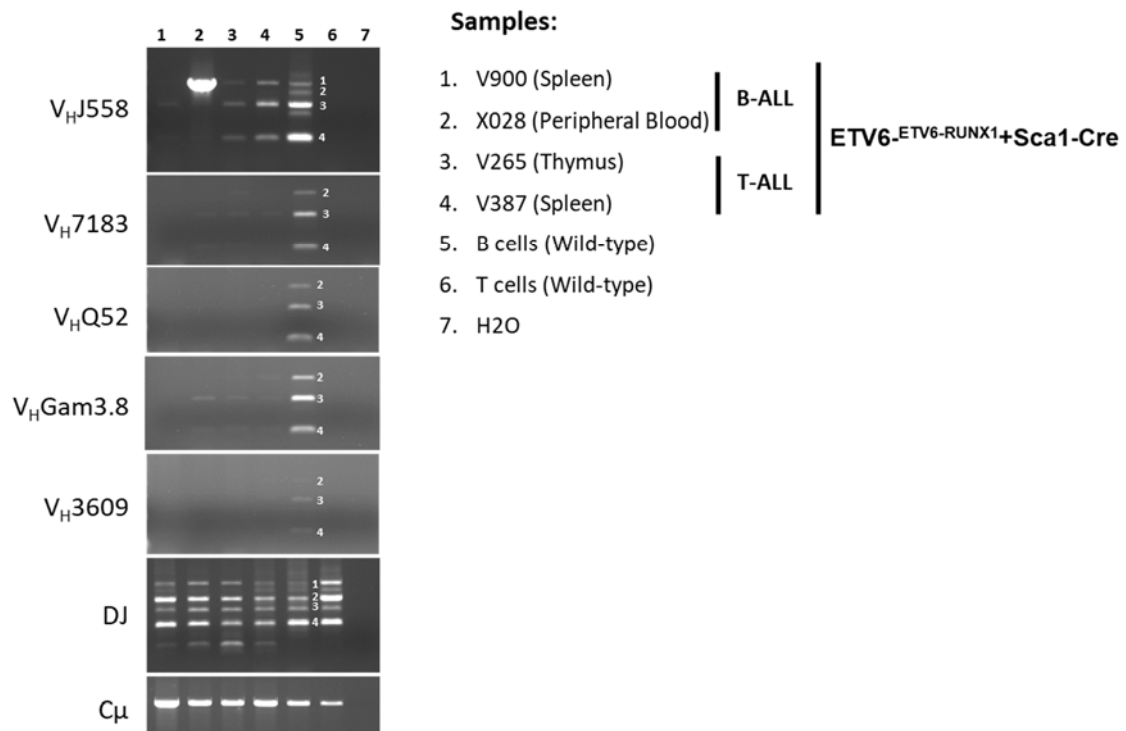

**Supplementary Figure 7. BCR clonality in ETV6-ETV6-RUNX1+Sca1-Cre mice with either B-ALL or T-ALL.** PCR analysis of BCR gene rearrangements in infiltrated tissues (spleen, peripheral blood, thymus and spleen) of diseased mice. Sorted CD19<sup>+</sup> splenic B cells (B cells) of healthy mice serve as a control for polyclonal BCR rearrangements. DP T cells from the thymus of healthy mice served as a negative control. Infiltrated tissues shows an increased clonality within their BCR repertoire (indicated by the code number of each mouse analyzed).



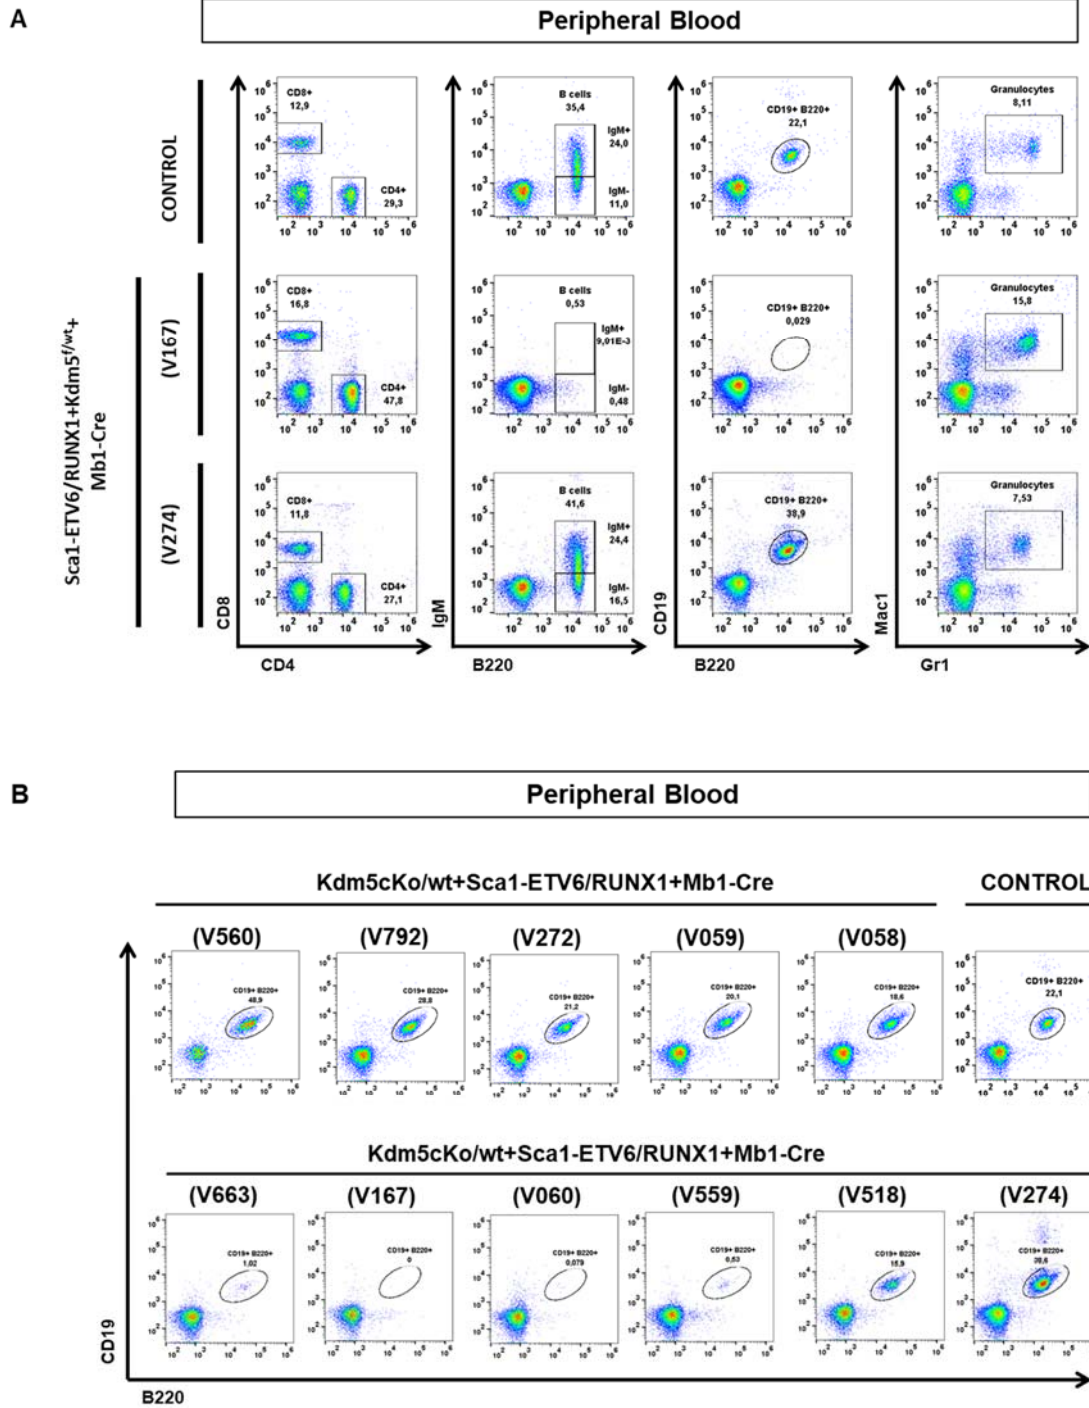

**Supplementary Figure 8. The absence of Kdm5c at proB cell level damages B-cell development. A)** Representative peripheral blood FACs analysis of distinct cell subsets in Kdm5c<sup>f/wt</sup>+ Sca1-ETV6/RUNX1+Mb1-Cre with (V274) and without (V167) B cells. **B)** B cells (CD19+ B220+) flow cytometry charts of Kdm5c<sup>f/wt</sup>+ Sca1-ETV6/RUNX1+Mb1-Cre mice illustrating the absence of B cells in some of the mice (V663, V167, V060, and V559). An age-matched control wild-type mouse is shown as the control (6 months old).



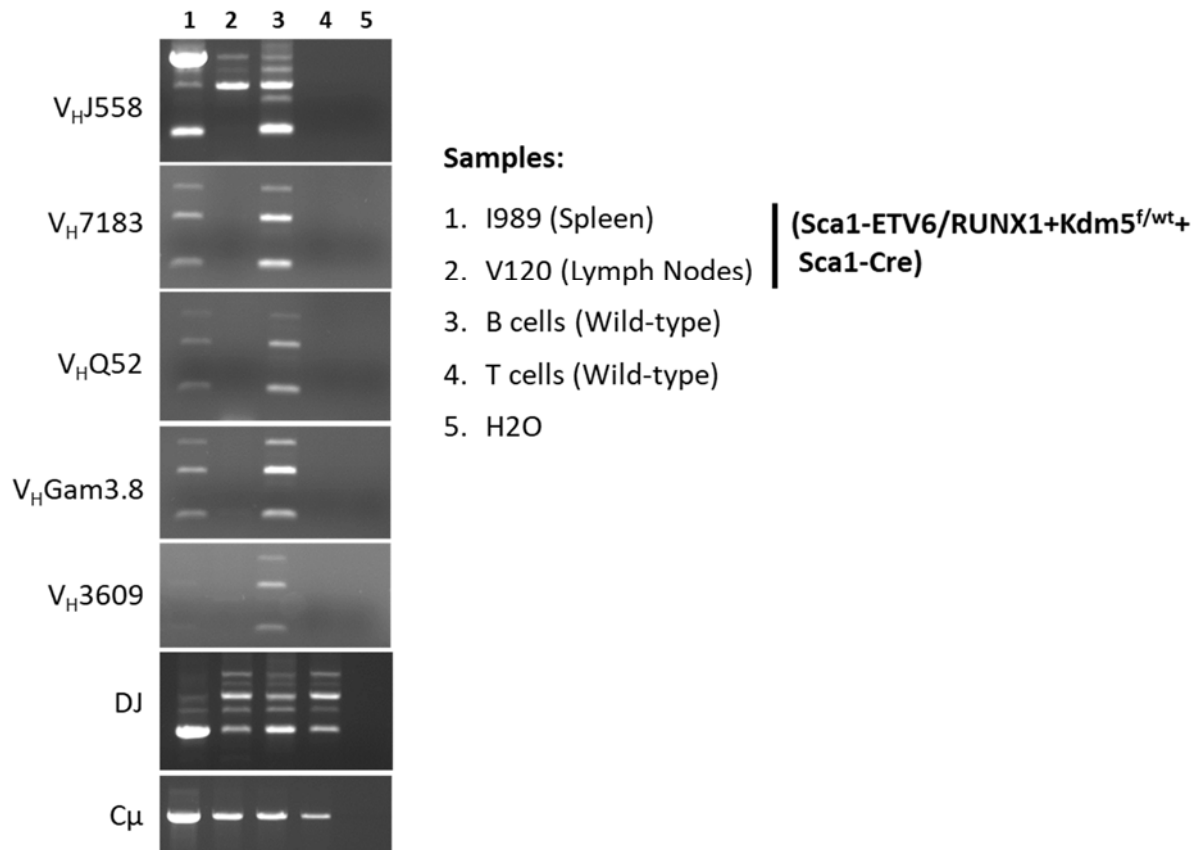

**Supplementary Figure 10. BCR clonality in Sca1-ETV6-RUNX1+Kdm5<sup>f/wt</sup>+Sca1-Cre mice with B-ALL.** PCR analysis of BCR gene rearrangements in infiltrated tissues (spleen and lymph nodes) of diseased mice. Sorted CD19<sup>+</sup> splenic B cells (B cells) of healthy mice serve as a control for polyclonal BCR rearrangements. DP T cells from the thymus of healthy mice served as a negative control. Infiltrated tissues shows an increased clonality within their BCR repertoire (indicated by the code number of each mouse analyzed).

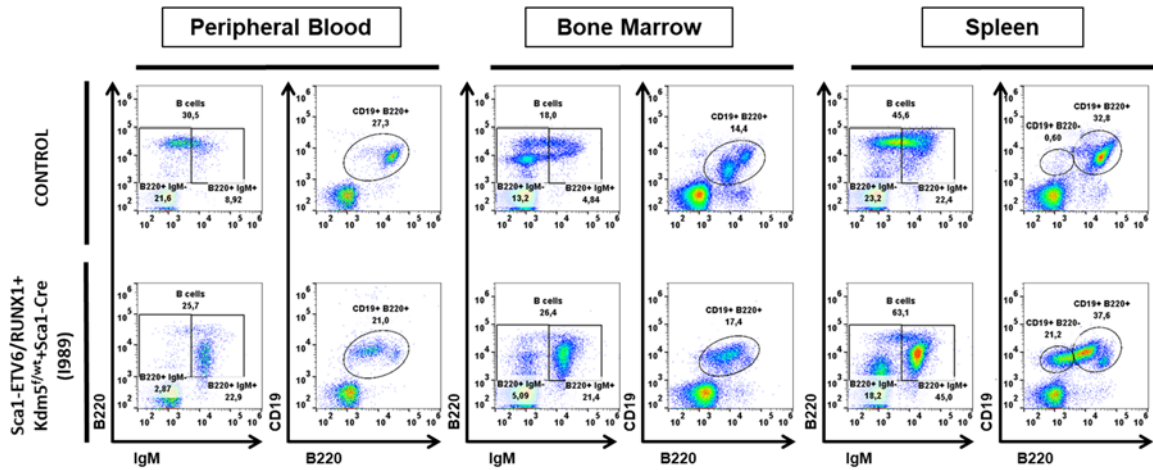

**Supplementary Figure 11. B cell neoplasia in *Sca1-ETV6/RUNX1+ Kdm5c<sup>f/wt</sup> + Sca1-Cre* mice.** Flow cytometric analysis of hematopoietic subsets in diseased *Sca1-ETV6/RUNX1+ Kdm5c<sup>f/wt</sup> + Sca1-Cre* mice. Representative plots of cell subsets from the peripheral blood, bone marrow and spleen show accumulation of blast B cells in disease mice compared to control littermate wild-type mice age-matched (age: 22 months-old).



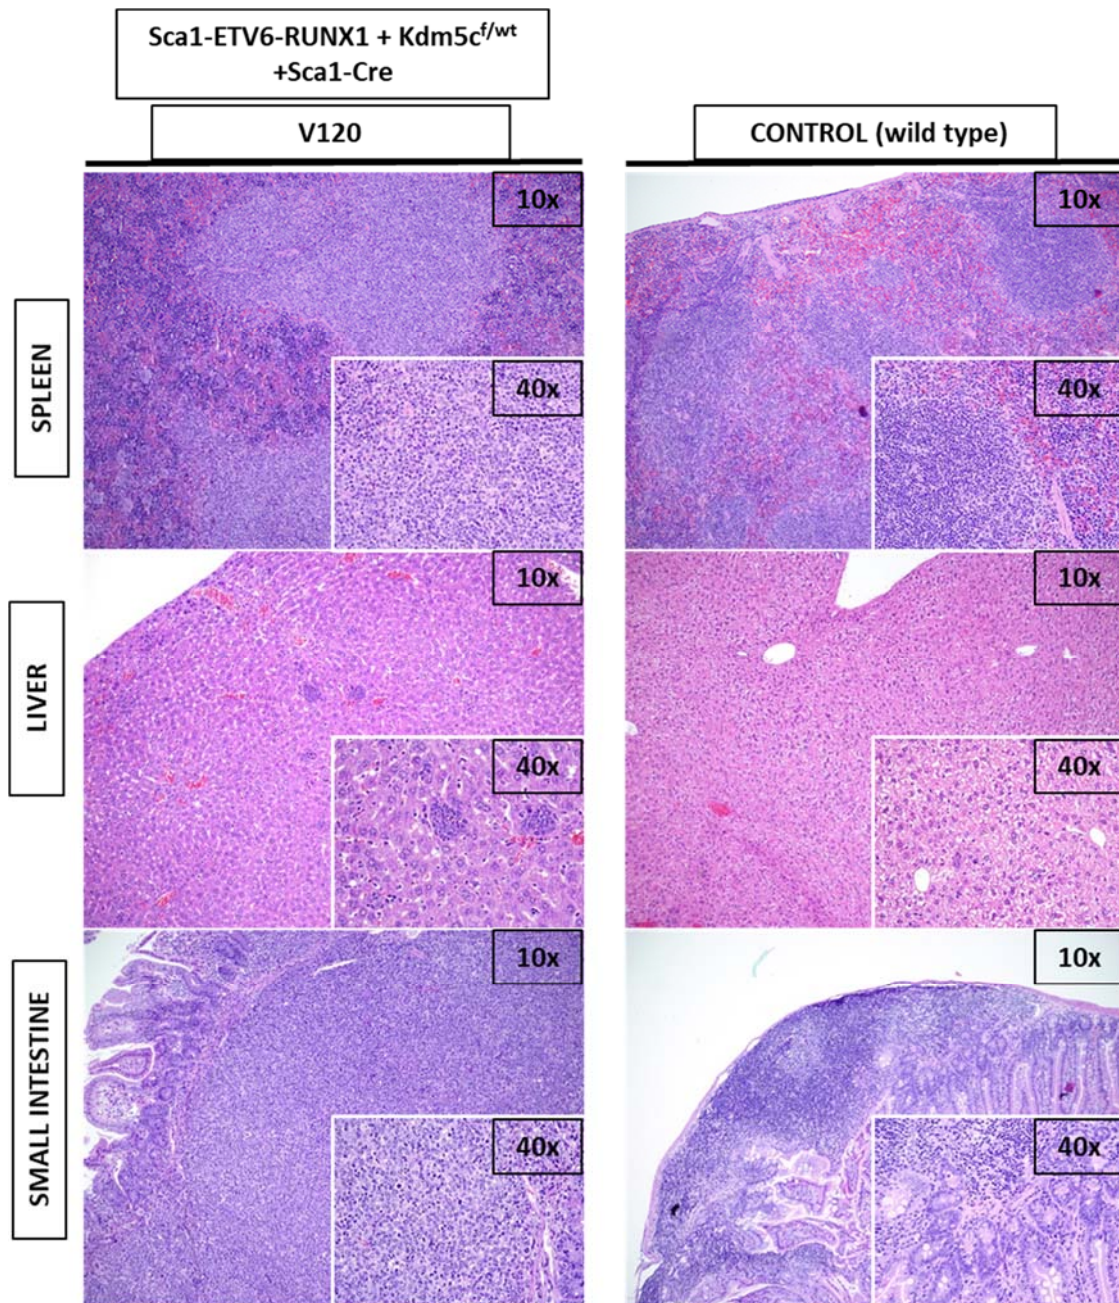

**Supplementary Figure 12. Histological images of Sca1-ETV6/RUNX1+ Kdm5c<sup>f/wt</sup> + Sca1-Cre disease mice with B-ALL.** Hematoxylin and eosin staining of spleen, liver and small intestine from wild-type and tumor-bearing Sca1-ETV6/RUNX1+ Kdm5c<sup>f/wt</sup> + Sca1-Cre mice shows loss of normal architecture resulting from effacement with tumoral B cells.

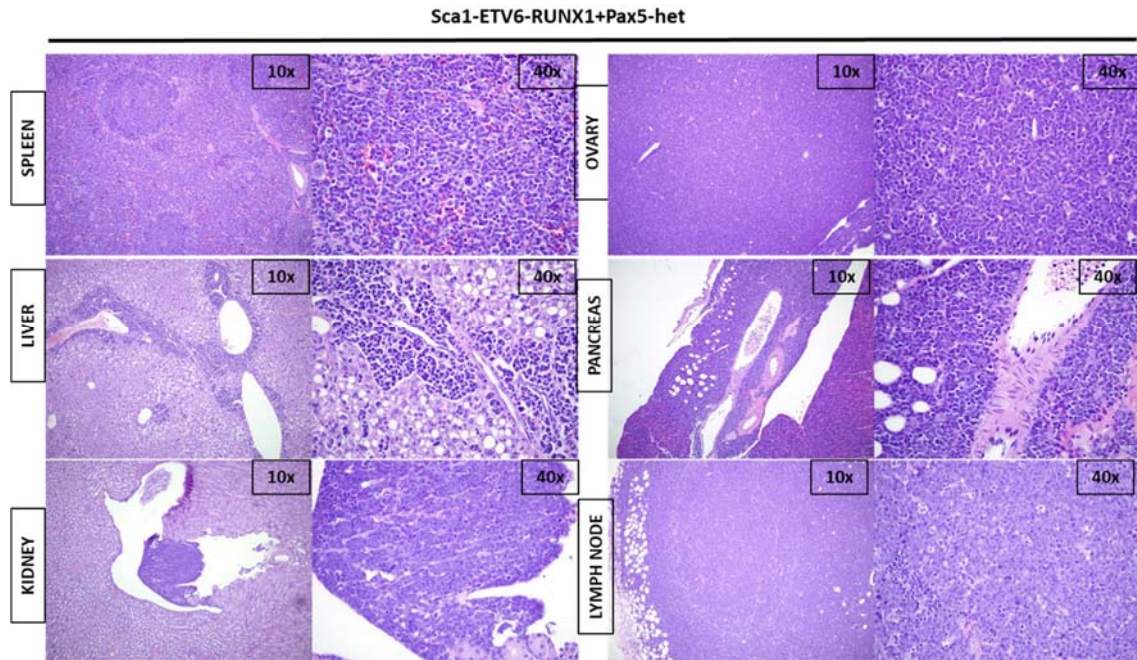

**Supplementary Figure 13. Histological images of Sca1-ETV6/RUNX1+ Pax5-het disease mice with B-ALL.** Hematoxylin and eosin staining of spleen, liver and kidney from tumor-bearing Sca1-ETV6/RUNX1+ Pax5-het mice shows loss of normal architecture resulting from effacement with tumoral B cells.



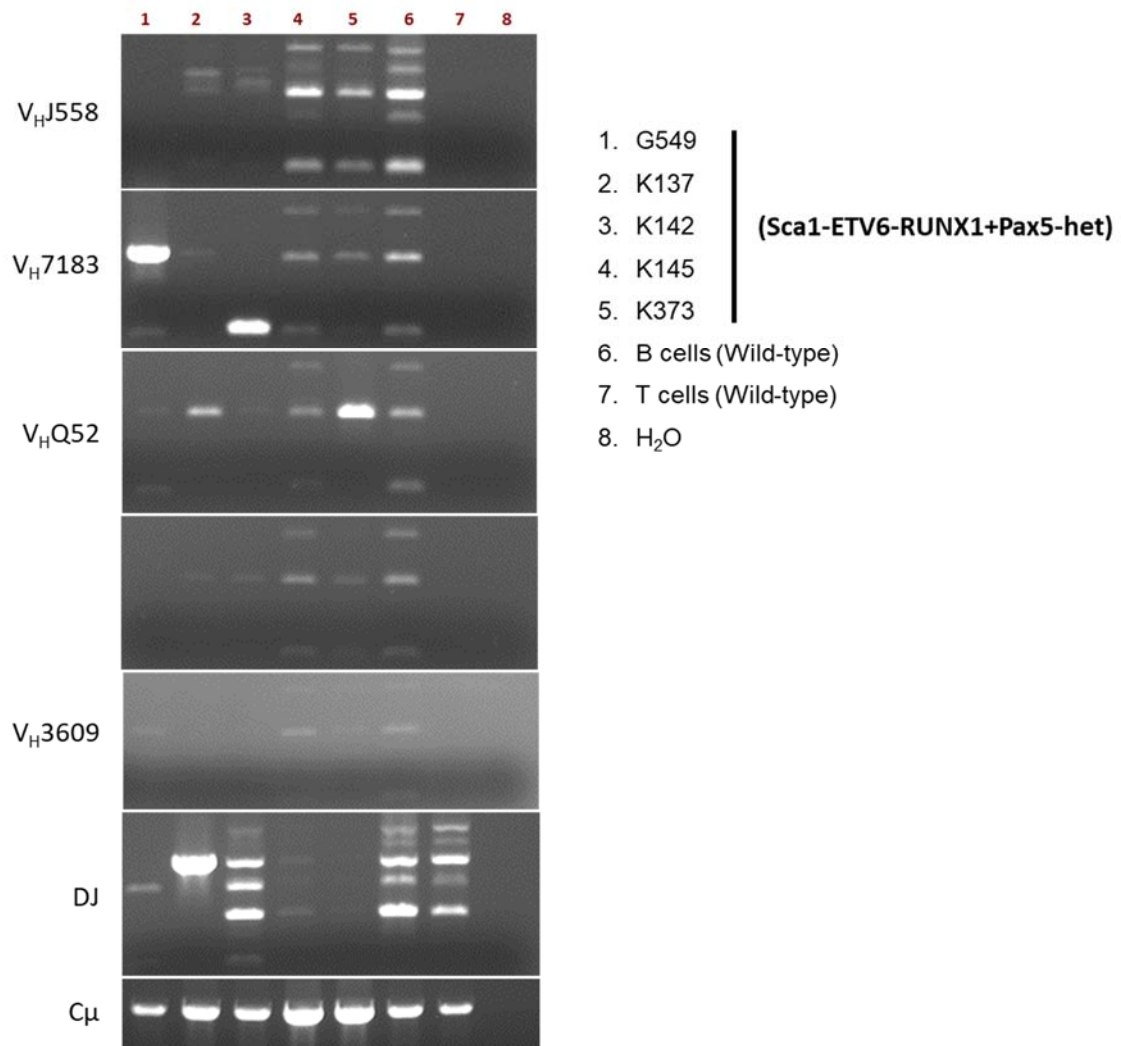

**Supplementary Figure 14. BCR clonality in *Sca1-ETV6-RUNX1+Pax5-het* mice with B-ALL.** PCR analysis of *BCR* gene rearrangements in infiltrated BM of diseased mice. Sorted CD19<sup>+</sup> splenic B cells (B cells) of healthy mice serve as a control for polyclonal BCR rearrangements. DP T cells from the thymus of healthy mice served as a negative control. Infiltrated tissues shows an increased clonality within their BCR repertoire (indicated by the code number of each mouse analyzed).

### Checklist S1:

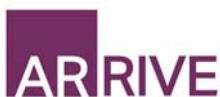

# The ARRIVE guidelines 2.0: author checklist

## The ARRIVE Essential 10

These items are the basic minimum to include in a manuscript. Without this information, readers and reviewers cannot assess the reliability of the findings.

| Item                                    | Recommendation                                                                                                                                                                                                                                                                                                                                                                                                                                                                                                                             | Section/line number, or reason for not reporting                                                                                                                |
|-----------------------------------------|--------------------------------------------------------------------------------------------------------------------------------------------------------------------------------------------------------------------------------------------------------------------------------------------------------------------------------------------------------------------------------------------------------------------------------------------------------------------------------------------------------------------------------------------|-----------------------------------------------------------------------------------------------------------------------------------------------------------------|
| <b>Study design</b>                     | 1 For each experiment, provide brief details of study design including: <ul style="list-style-type: none"> <li>a. The groups being compared, including control groups. If no control group has been used, the rationale should be stated.</li> <li>b. The experimental unit (e.g. a single animal, litter, or cage of animals).</li> </ul>                                                                                                                                                                                                 | Methods: Paragraph 1<br>Results: Paragraph 1, 2, 3, 4, and 7.<br><br>Methods: Paragraph 1<br>Results: Paragraph 1, 2, 3, and 5.                                 |
| <b>Sample size</b>                      | 2 a. Specify the exact number of experimental units allocated to each group, and the total number in each experiment. Also indicate the total number of animals used.<br>b. Explain how the sample size was decided. Provide details of any <i>a priori</i> sample size calculation, if done.                                                                                                                                                                                                                                              | Results: Paragraph 1, 2, 3, and 5.<br><br>Methods: Paragraph 1                                                                                                  |
| <b>Inclusion and exclusion criteria</b> | 3 a. Describe any criteria used for including and excluding animals (or experimental units) during the experiment, and data points during the analysis. Specify if these criteria were established <i>a priori</i> . If no criteria were set, state this explicitly.<br>b. For each experimental group, report any animals, experimental units or data points not included in the analysis and explain why. If there were no exclusions, state so.<br>c. For each analysis, report the exact value of <i>n</i> in each experimental group. | Methods: Paragraph 1<br><br>Methods: Paragraph 1<br><br>Results: Paragraph 1, 2, 3, and 5.<br>Figures: 2, 3, 5, 6 and 7.<br>Supplementary figures: 9            |
| <b>Randomisation</b>                    | 4 a. State whether randomisation was used to allocate experimental units to control and treatment groups. If done, provide the method used to generate the randomisation sequence.<br>b. Describe the strategy used to minimise potential confounders such as the order of treatments and measurements, or animal/cage location. If confounders were not controlled, state this explicitly.                                                                                                                                                | Methods:<br>Paragraph 1<br><br>Methods:<br>Paragraph 1                                                                                                          |
| <b>Blinding</b>                         | 5 Describe who was aware of the group allocation at the different stages of the experiment (during the allocation, the conduct of the experiment, the outcome assessment, and the data analysis).                                                                                                                                                                                                                                                                                                                                          | Methods:<br>Paragraph 1                                                                                                                                         |
| <b>Outcome measures</b>                 | 6 a. Clearly define all outcome measures assessed (e.g. cell death, molecular markers, or behavioural changes).<br>b. For hypothesis-testing studies, specify the primary outcome measure, i.e. the outcome measure that was used to determine the sample size.                                                                                                                                                                                                                                                                            | Methods: Paragraph 1, 2<br><br>Methods: Paragraph 1                                                                                                             |
| <b>Statistical methods</b>              | 7 a. Provide details of the statistical methods used for each analysis, including software used.<br>b. Describe any methods used to assess whether the data met the assumptions of the statistical approach, and what was done if the assumptions were not met.                                                                                                                                                                                                                                                                            | Methods: Paragraph 16<br>Supplementary Table 3<br><br>Methods: Paragraph 16                                                                                     |
| <b>Experimental animals</b>             | 8 a. Provide species-appropriate details of the animals used, including species, strain and substrain, sex, age or developmental stage, and, if relevant, weight.<br>b. Provide further relevant information on the provenance of animals, health/immune status, genetic modification status, genotype, and any previous procedures.                                                                                                                                                                                                       | Methods: Paragraphs 1-2<br><br>Methods: Paragraphs 1-2                                                                                                          |
| <b>Experimental procedures</b>          | 9 For each experimental group, including controls, describe the procedures in enough detail to allow others to replicate them, including: <ul style="list-style-type: none"> <li>a. What was done, how it was done and what was used.</li> <li>b. When and how often.</li> <li>c. Where (including detail of any acclimatisation periods).</li> <li>d. Why (provide rationale for procedures).</li> </ul>                                                                                                                                  | Methods: Paragraphs 1-2-4-6<br><br>Methods: Paragraphs 1-2<br><br>Methods: Paragraphs 1-2<br><br>Methods: Paragraphs 2<br>Results: Paragraph 1, 2, 3, 4, and 7. |
| <b>Results</b>                          | 10 For each experiment conducted, including independent replications, report: <ul style="list-style-type: none"> <li>a. Summary/descriptive statistics for each experimental group, with a measure of variability where applicable (e.g. mean and SD, or median and range).</li> <li>b. If applicable, the effect size with a confidence interval.</li> </ul>                                                                                                                                                                              | Figures: 2, 5, and 6.<br>Supplementary figures: 9<br><br>Not applicable                                                                                         |
